# Supplementary material for: Evaluation of the Immunoprotective Capacity of Five Vaccine Candidate Proteins against Avian Necrotic Enteritis and Impact on the Caecal Microbiota of Vaccinated Birds
Source: MDPI journal article supplement (doi:10.3390/ani13213323), 2023-10-26
Supplement: s1 [file s1]

Supporting Information

a

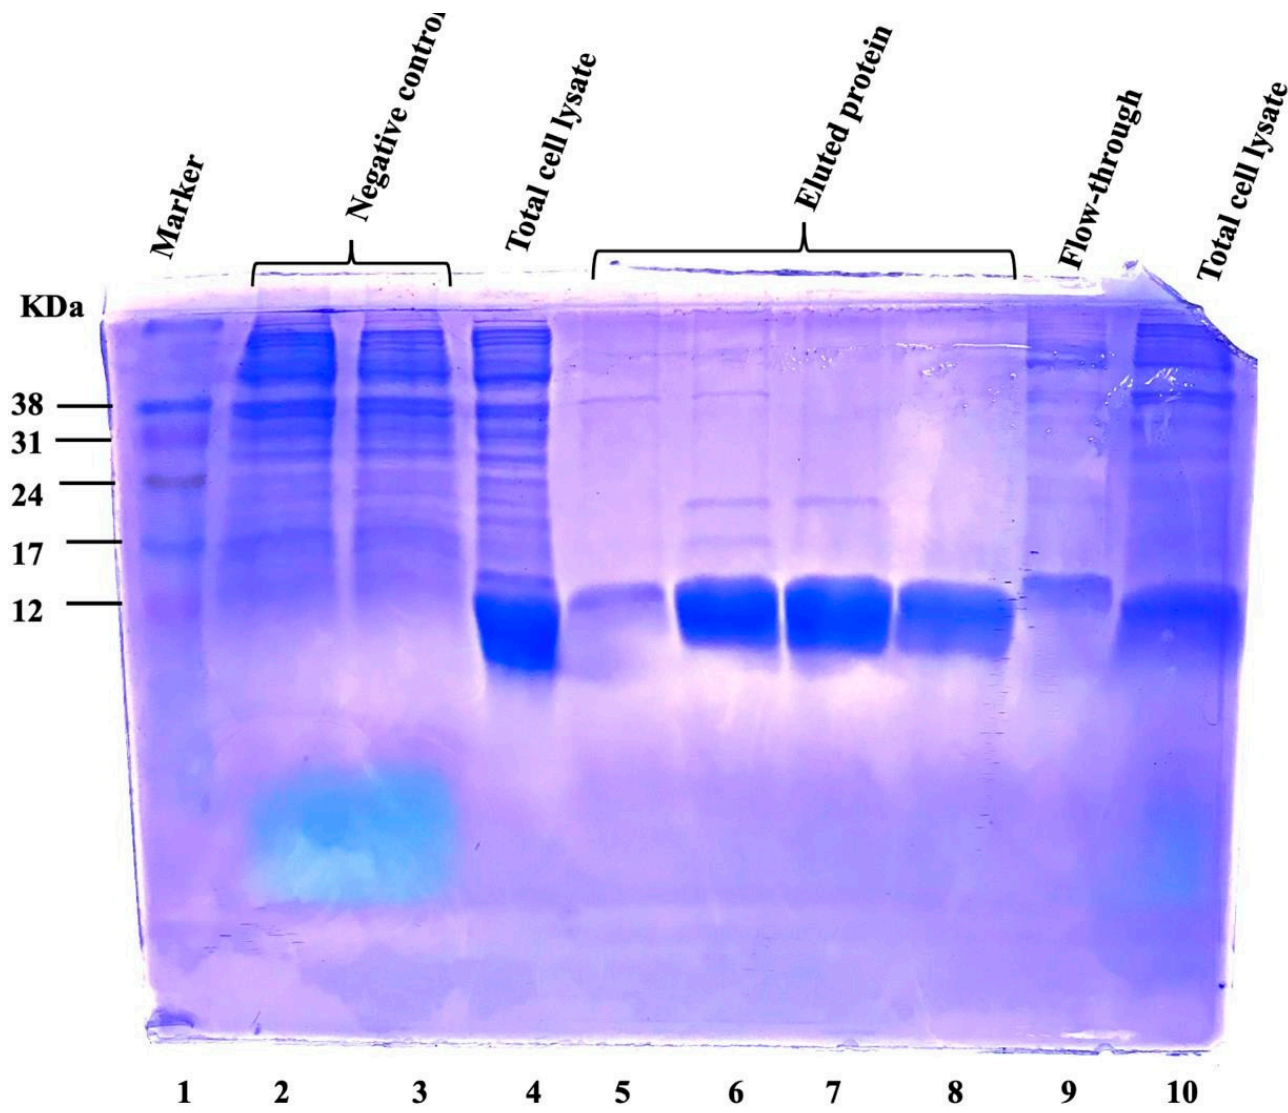

b

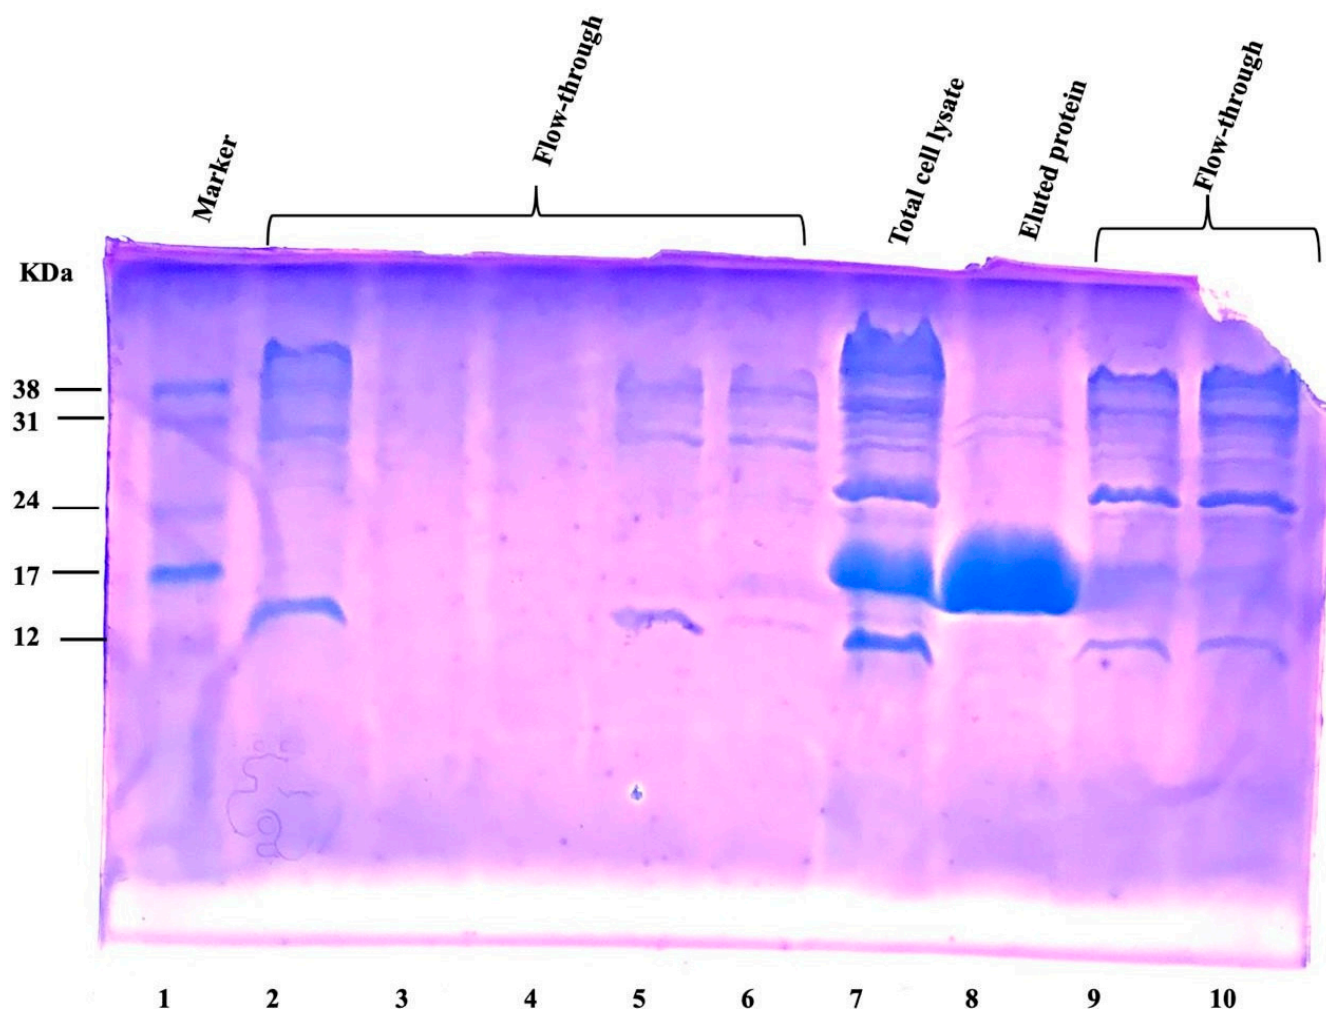

c

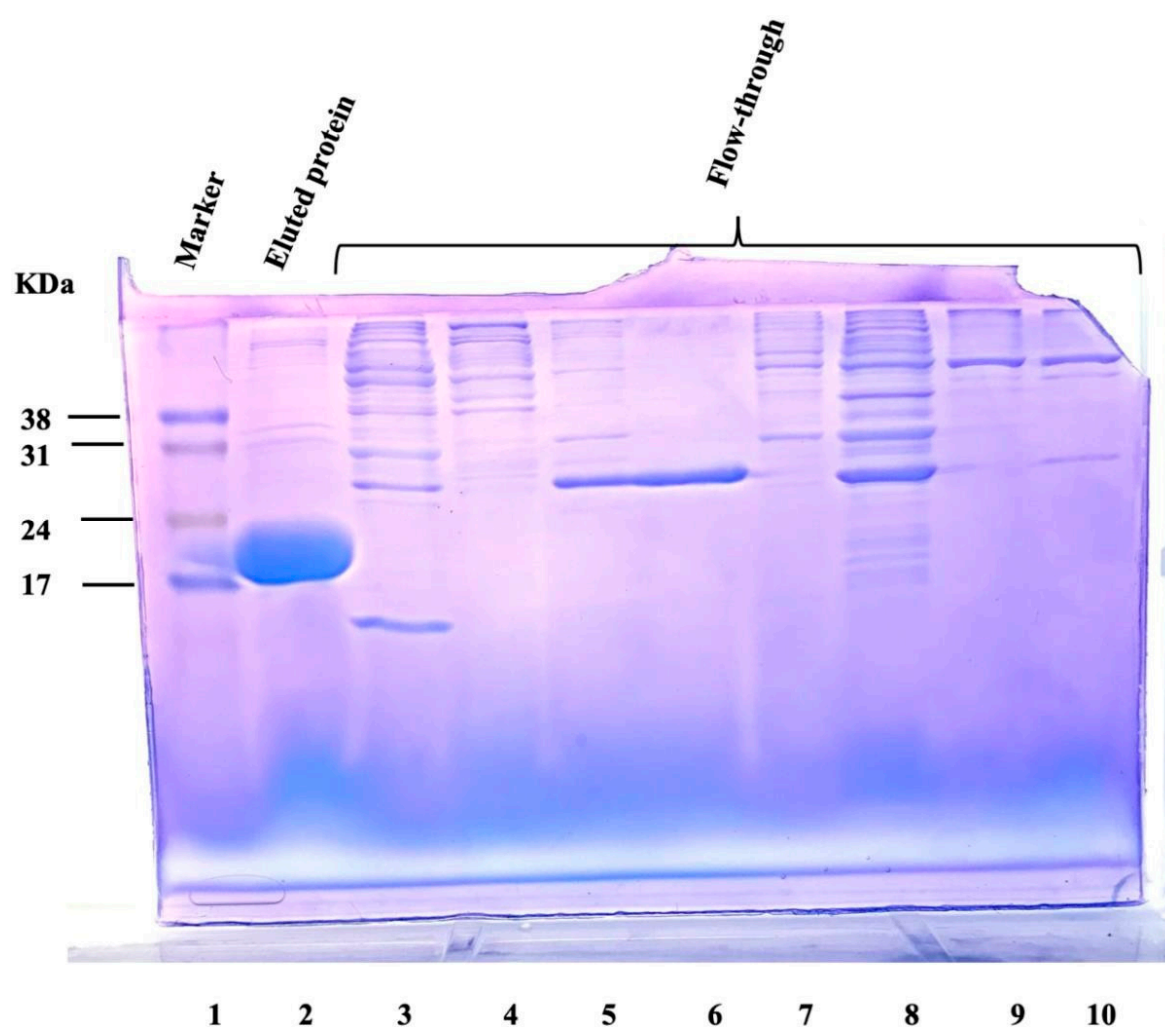

d

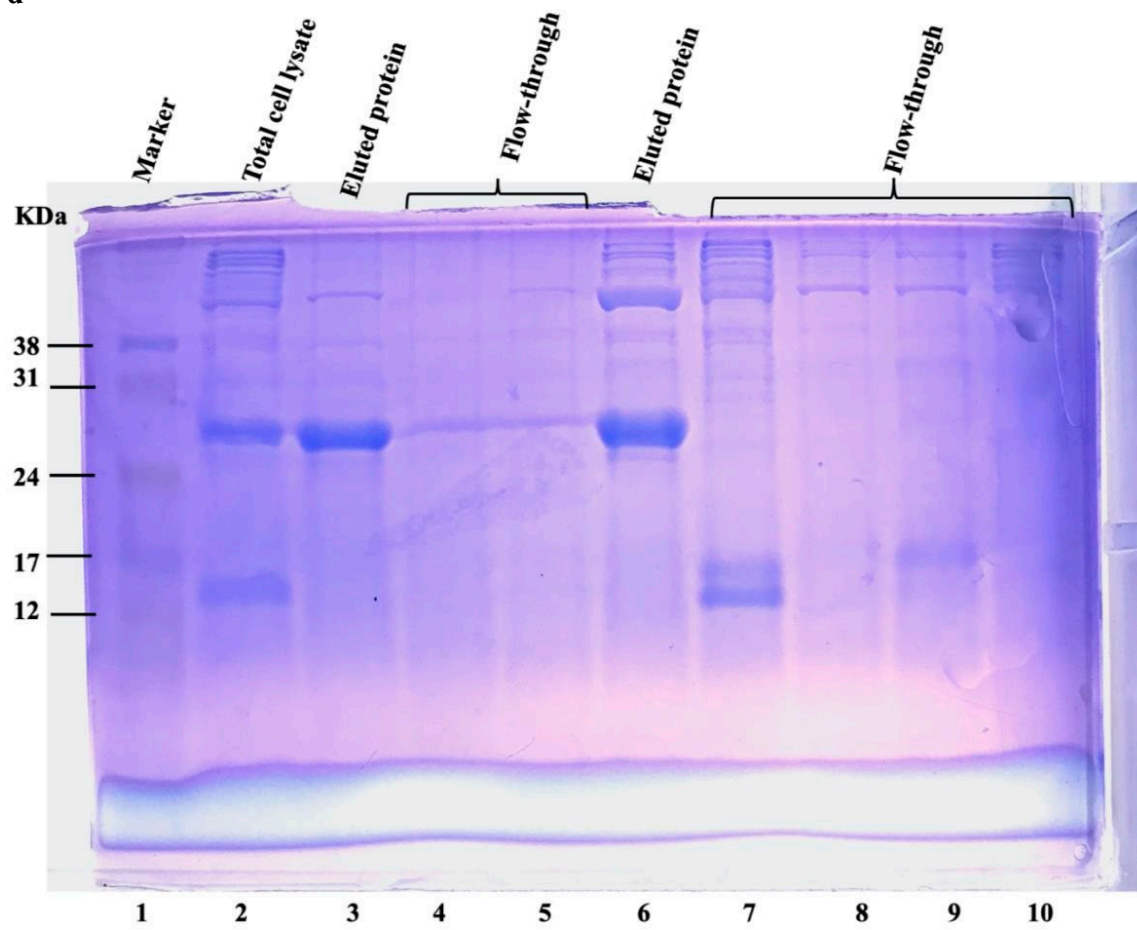

e

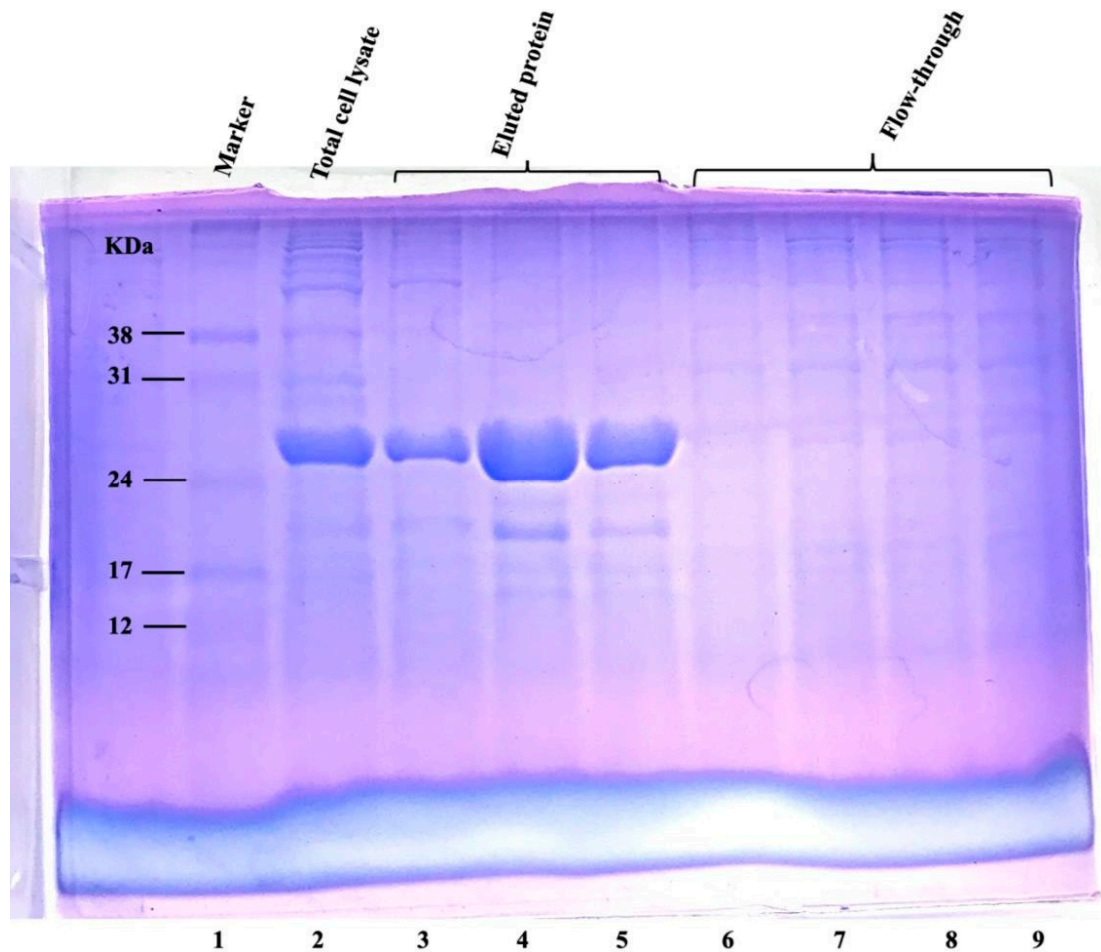

**Figure S1.** Coomassie blue stained SDS-PAGE gels showing purification of His-tagged recombinant proteins by Ni-NTA affinity chromatography. A volume of 15  $\mu$ L of crude *E. coli* extract and fractions of (a) P153, (b) P264, (c) P509, (d) P537, and (e) P561 were loaded onto 15% SDS-polyacrylamide gels. The size of the protein of interest is 4 KDa higher than the predicted size due to the insertion of V5 and His-tag at the N-terminal of each coding sequence. Negative control sample in **Figure S1.a** corresponds to the crude cell lysate from BL21 cells that were transformed with pET empty vector.

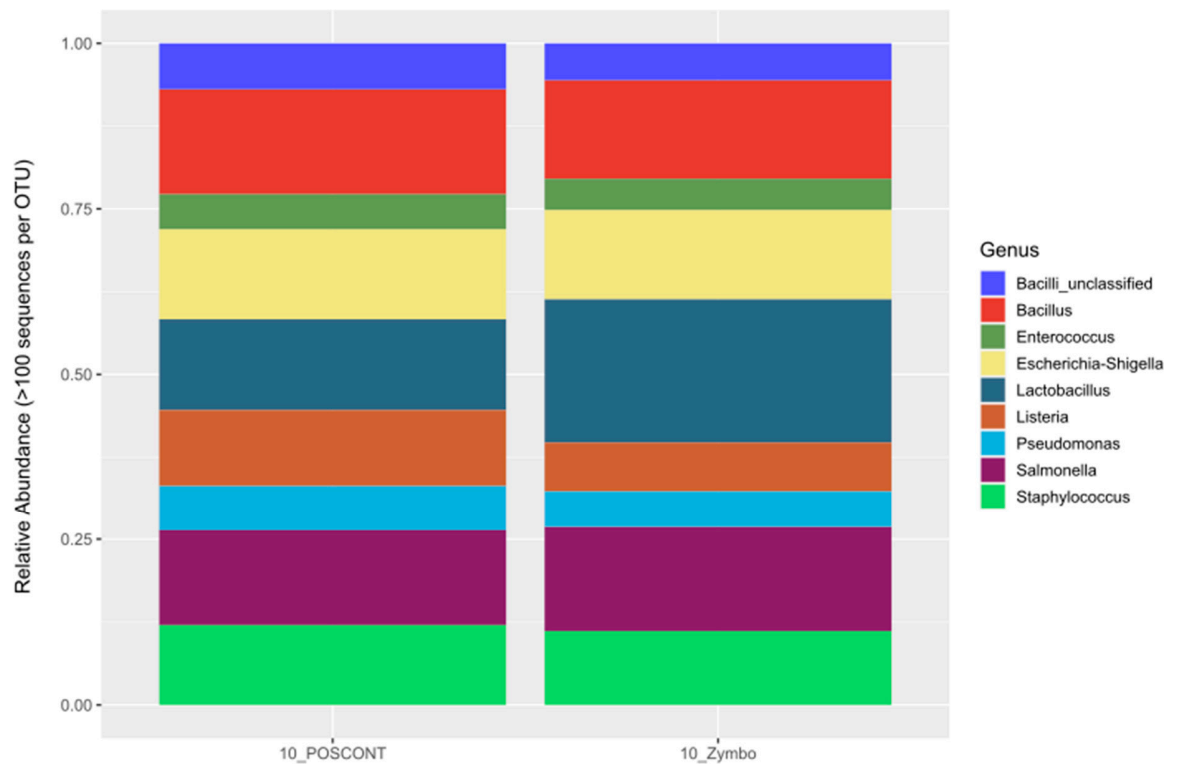

**Figure S2.** Stacked bar-plots showing the relative abundance of the major bacterial genera in positive controls.

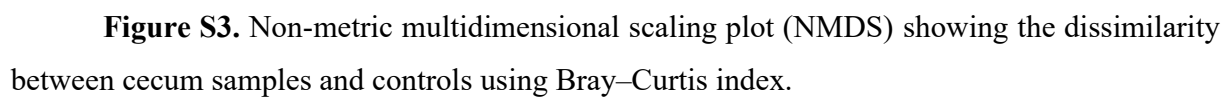

**Figure S3.** Non-metric multidimensional scaling plot (NMDS) showing the dissimilarity between cecum samples and controls using Bray–Curtis index.



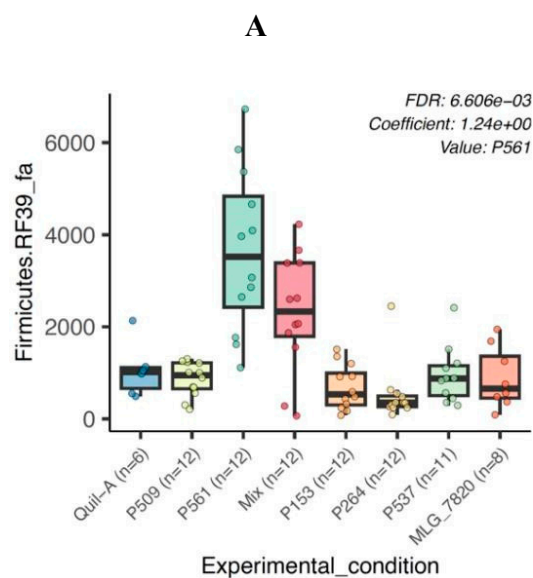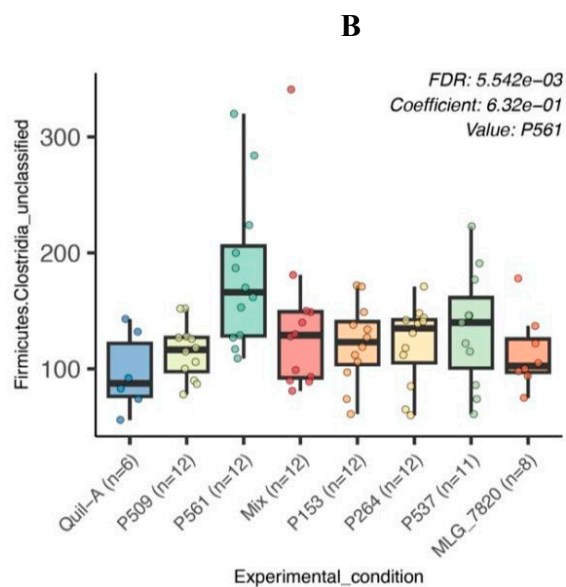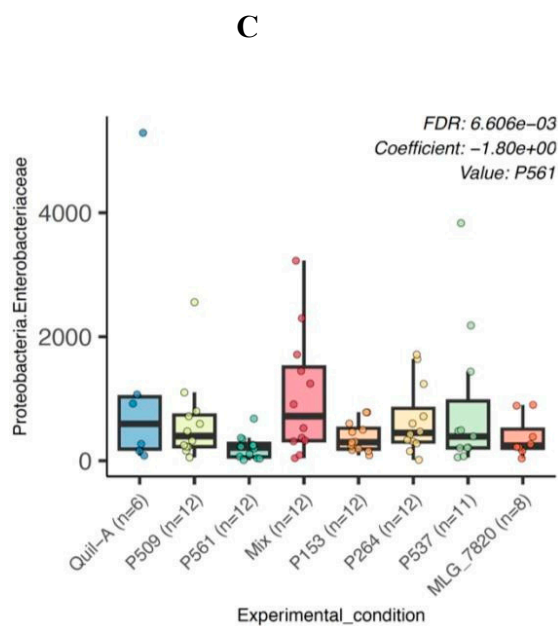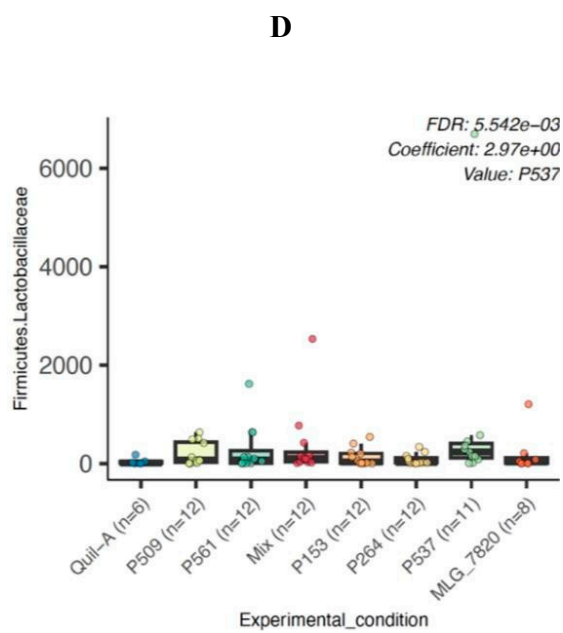



**E**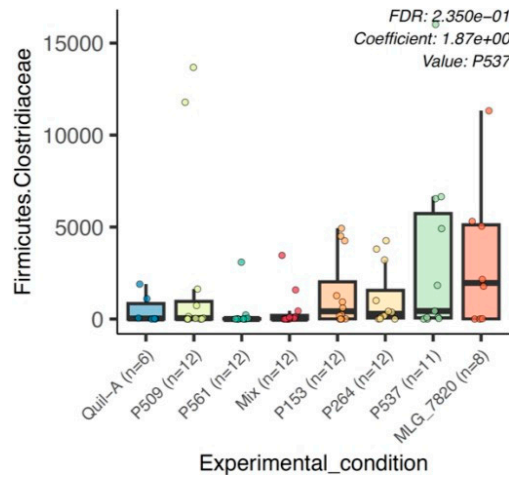**F**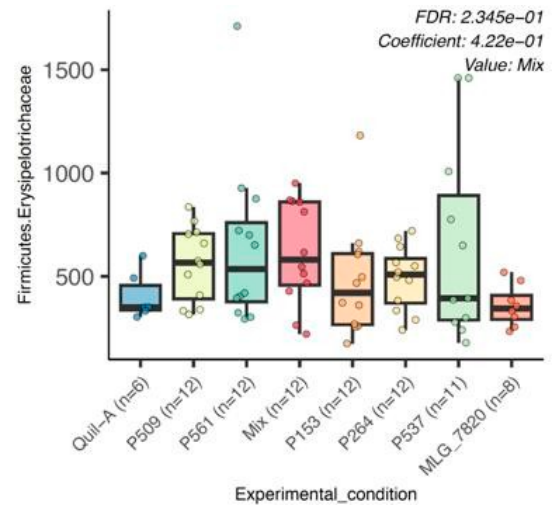**G**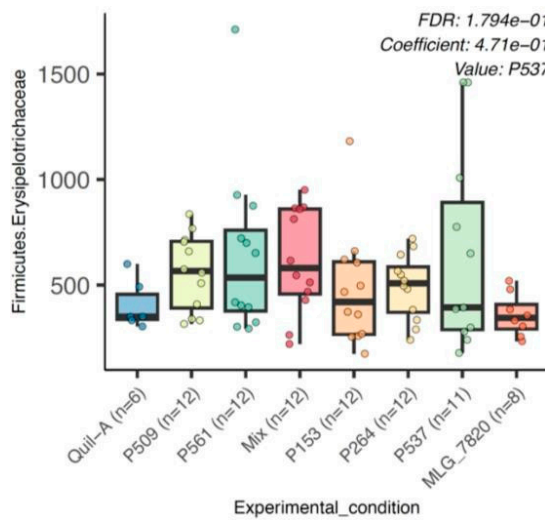**H**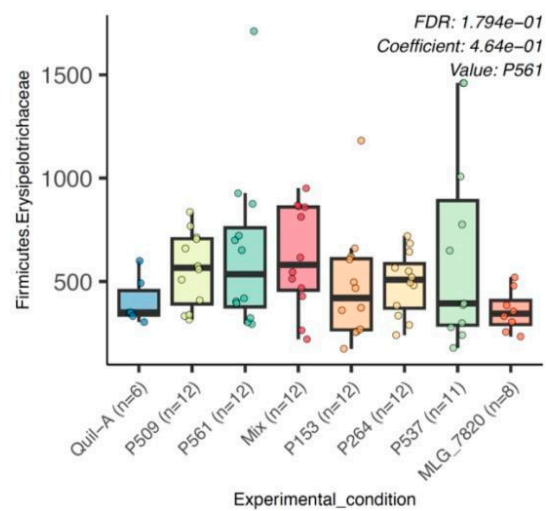

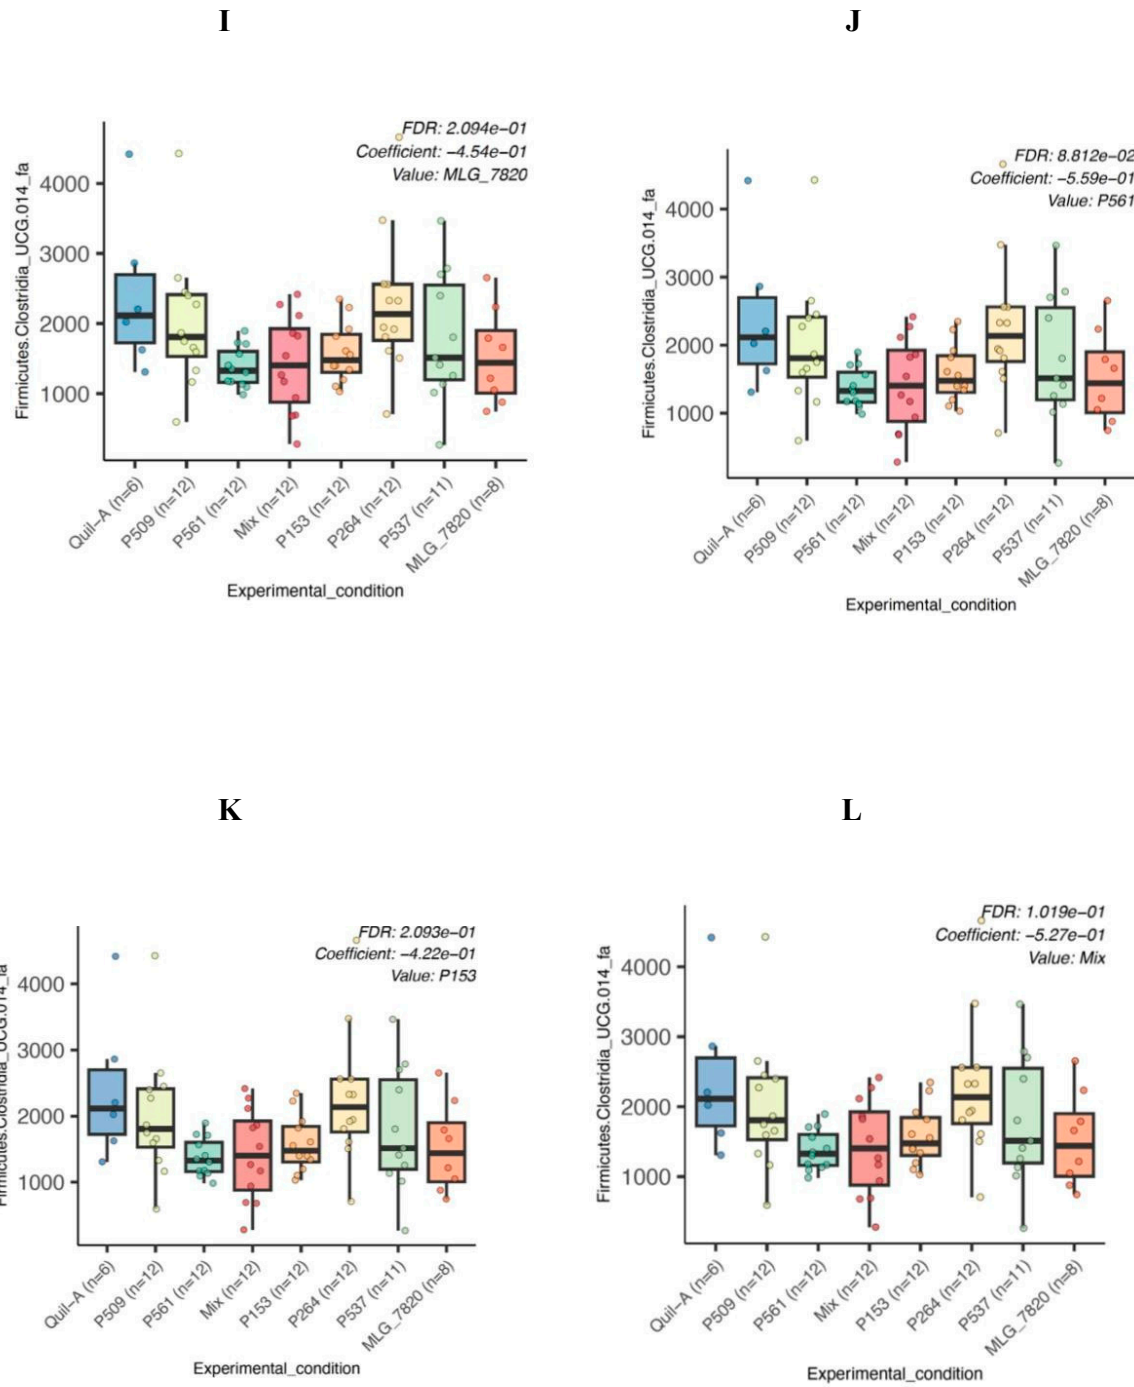

**Figure S4.** Statistically significant changes ( $p$ -value  $< 0.05$ ) in key bacterial families of interest across experimental groups.

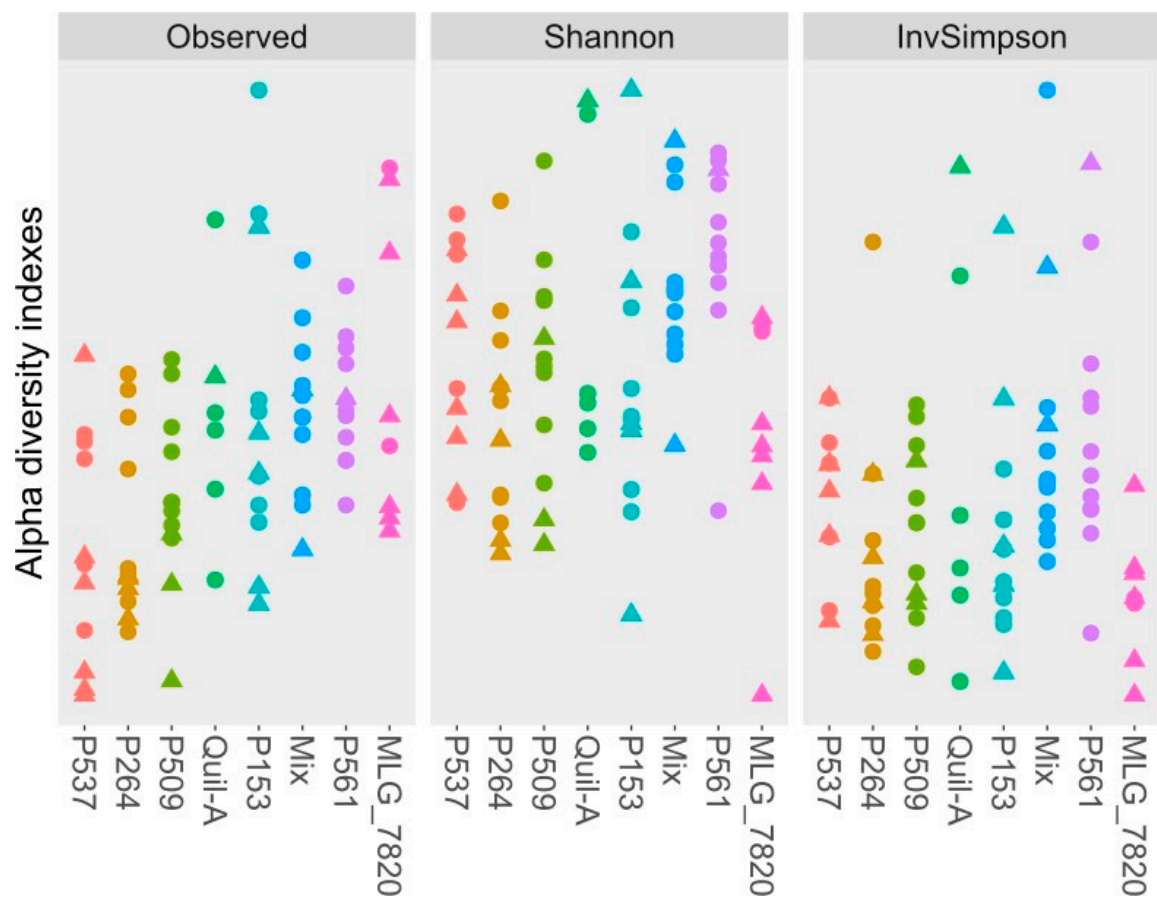

**Figure S5.** Alpha diversity measures among the samples at day 33, using Observed, Shannon, and Inverse Simpson indices.
